# Supplementary material for: Microbial community structure shows differing levels of temporal stability in intertidal beach sands of the grand strand region of South Carolina
Source: PubMed Central journal article supplement (PMC7046189; doi:10.1371/journal.pone.0229387), 2020-02-27

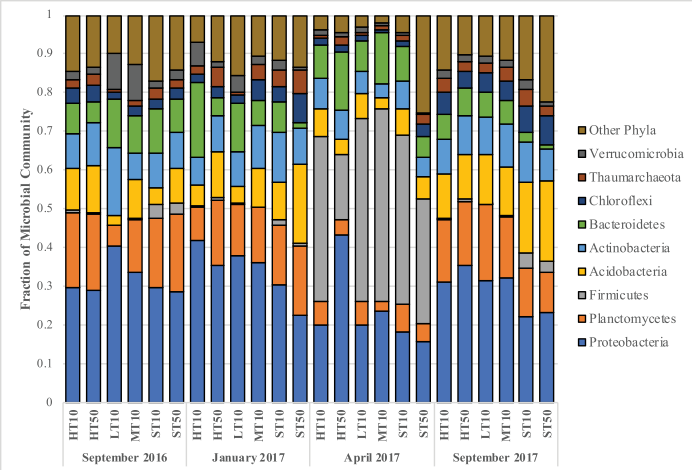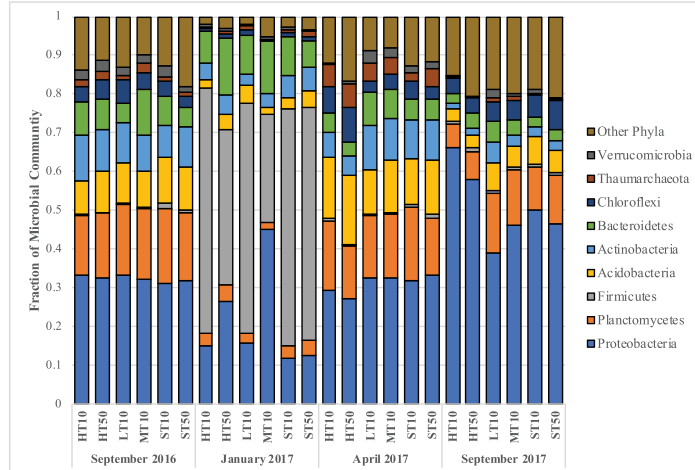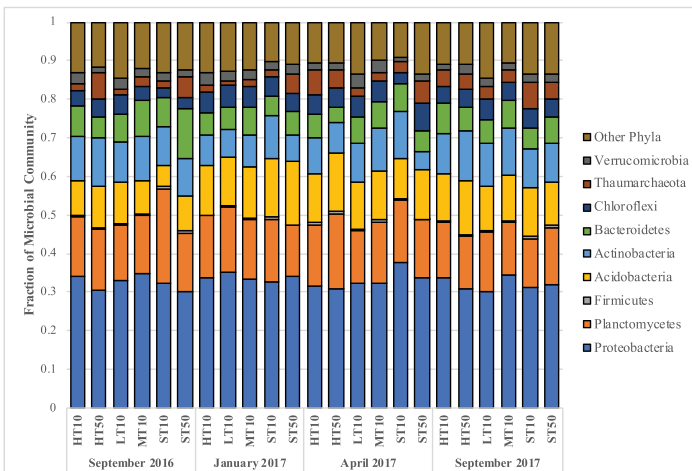

Supplement: pone.0229387.s001.pdf [file pone.0229387.s001.pdf]
