# Supplementary material for: Microbial community structure shows differing levels of temporal stability in intertidal beach sands of the grand strand region of South Carolina
Source: PubMed Central journal article supplement (PMC7046189; doi:10.1371/journal.pone.0229387), 2020-02-27
Supplement: pone.0229387.s006.pdf [file pone.0229387.s006.pdf]

| Sample <sup>a</sup> | Seawater Temperature (°C) <sup>b</sup> |           |            |            | Sand Moisture Content (%) |           |            |            | Ammonium (nmol g <sup>-1</sup> sand) |           |            |            | Nitrite (nmol g <sup>-1</sup> sand) |           |            |            | Nitrate (nmol g <sup>-1</sup> sand) |           |            |            |
|---------------------|----------------------------------------|-----------|------------|------------|---------------------------|-----------|------------|------------|--------------------------------------|-----------|------------|------------|-------------------------------------|-----------|------------|------------|-------------------------------------|-----------|------------|------------|
|                     | Sept. 2016                             | Jan. 2017 | April 2017 | Sept. 2017 | Sept. 2016                | Jan. 2017 | April 2017 | Sept. 2017 | Sept. 2016                           | Jan. 2017 | April 2017 | Sept. 2017 | Sept. 2016                          | Jan. 2017 | April 2017 | Sept. 2017 | Sept. 2016                          | Jan. 2017 | April 2017 | Sept. 2017 |
| ST10                | 28                                     | 12.8      | 22.6       | 27.4       | 5.28                      | 4.89      | 4.78       | 6.59       | 70.81                                | 45.74     | 48.36      | 163.3      | 3.78                                | 2.21      | 1.42       | 0.92       | 313.8                               | 268       | 125.6      | 216.8      |
| ST50                |                                        |           |            |            | 10.69                     | 3.87      | 9.87       | 17.97      | 142.4                                | 60.06     | 54.64      | 89.2       | 7.08                                | 4.06      | 2.26       | 0.99       | 228.8                               | 261.5     | 139.3      | 116.5      |
| HT10                |                                        |           |            |            | 4.98                      | 7.42      | 11.35      | 7.94       | 65.44                                | 43.95     | 29.51      | 45.22      | 3.37                                | 1.81      | 0.94       | 2.78       | 179.8                               | 258.2     | 141.3      | 105        |
| HT50                |                                        |           |            |            | 14.08                     | 16.24     | 20.60      | 6.33       | 63.65                                | 79.76     | 73.49      | 29.51      | 3.16                                | 3.55      | 2.08       | 2.37       | 215.7                               | 294.2     | 145.2      | 102.1      |
| MT10                |                                        |           |            |            | 22.23                     | 22.06     | 21.58      | 14.11      | 35.02                                | 49.32     | 63.02      | 35.79      | 1.11                                | 0.9       | 1.68       | 2.12       | 209.2                               | 287.6     | 139.3      | 113.8      |
| LT10                |                                        |           |            |            | 21.05                     | 21.52     | 20.79      | 20.53      | 45.74                                | 61.85     | 42.08      | 23.23      | 1.23                                | 1.15      | 0.8        | 1.81       | 228.8                               | 287.6     | 129.5      | 102.1      |
