# Supplementary material for: Microbial community structure shows differing levels of temporal stability in intertidal beach sands of the grand strand region of South Carolina
Source: PubMed Central journal article supplement (PMC7046189; doi:10.1371/journal.pone.0229387), 2020-02-27
Supplement: pone.0229387.s007.pdf [file pone.0229387.s007.pdf]

| Sample <sup>a</sup> | Seawater Temperature (°C) <sup>b</sup> |           |            |            | Sand Moisture Content (%) |           |            |            | Ammonium (nmol g <sup>-1</sup> sand) |           |            |            | Nitrite (nmol g <sup>-1</sup> sand) |           |            |            | Nitrate (nmol g <sup>-1</sup> sand) |           |            |            |
|---------------------|----------------------------------------|-----------|------------|------------|---------------------------|-----------|------------|------------|--------------------------------------|-----------|------------|------------|-------------------------------------|-----------|------------|------------|-------------------------------------|-----------|------------|------------|
|                     | Sept. 2016                             | Jan. 2017 | April 2017 | Sept. 2017 | Sept. 2016                | Jan. 2017 | April 2017 | Sept. 2017 | Sept. 2016                           | Jan. 2017 | April 2017 | Sept. 2017 | Sept. 2016                          | Jan. 2017 | April 2017 | Sept. 2017 | Sept. 2016                          | Jan. 2017 | April 2017 | Sept. 2017 |
| ST10                | 28                                     | 13.2      | 22.8       | 26.8       | 4.43                      | 5.07      | 4.80       | 4.63       | 52.9                                 | 56.48     | 81.87      | 205.4      | 3.9                                 | 2.17      | 3.48       | 3.54       | 196.1                               | 196.1     | 160.9      | 160.9      |
| ST50                |                                        |           |            |            | 12.70                     | 3.54      | 4.42       | 7.36       | 69.02                                | 36.79     | 67.21      | 186.6      | 3.65                                | 1.54      | 2.46       | 2.33       | 232.1                               | 192.9     | 164.8      | 122.7      |
| HT10                |                                        |           |            |            | 4.95                      | 6.71      | 14.20      | 10.84      | 43.95                                | 51.11     | 104.9      | 82.92      | 1.87                                | 1.31      | 3.06       | 1.5        | 228.8                               | 176.5     | 182.5      | 119.7      |
| HT50                |                                        |           |            |            | 15.23                     | 10.25     | 20.63      | 16.45      | 106.6                                | 31.42     | 278.7      | 152        | 3.12                                | 0.72      | 0.45       | 1.71       | 202.7                               | 179.8     | 178.5      | 134.4      |
| MT10                |                                        |           |            |            | 10.64                     | 18.14     | 18.92      | 22.22      | 51.11                                | 35        | 69.3       | 26.37      | 1.24                                | 0.5       | 0.65       | 1.68       | 202.7                               | 205.9     | 149.1      | 113.8      |
| LT10                |                                        |           |            |            | 13.20                     | 20.35     | 17.52      | 21.15      | 58.27                                | 51.11     | 54.64      | 123.8      | 1.35                                | 0.85      | 0.95       | 1.51       | 251.7                               | 189.6     | 160.9      | 125.6      |
