# Supplementary material for: Microbial community structure shows differing levels of temporal stability in intertidal beach sands of the grand strand region of South Carolina
Source: PubMed Central journal article supplement (PMC7046189; doi:10.1371/journal.pone.0229387), 2020-02-27
Supplement: pone.0229387.s008.pdf [file pone.0229387.s008.pdf]

| Sample <sup>a</sup> | Seawater Temperature (°C) <sup>b</sup> |           |            |            | Sand Moisture Content (%) |           |            |            | Ammonium (nmol g <sup>-1</sup> sand) |           |            |            | Nitrite (nmol g <sup>-1</sup> sand) |           |            |            | Nitrate (nmol g <sup>-1</sup> sand) |           |            |            |
|---------------------|----------------------------------------|-----------|------------|------------|---------------------------|-----------|------------|------------|--------------------------------------|-----------|------------|------------|-------------------------------------|-----------|------------|------------|-------------------------------------|-----------|------------|------------|
|                     | Sept. 2016                             | Jan. 2017 | April 2017 | Sept. 2017 | Sept. 2016                | Jan. 2017 | April 2017 | Sept. 2017 | Sept. 2016                           | Jan. 2017 | April 2017 | Sept. 2017 | Sept. 2016                          | Jan. 2017 | April 2017 | Sept. 2017 | Sept. 2016                          | Jan. 2017 | April 2017 | Sept. 2017 |
| ST10                | 28                                     | 13.4      | 22.6       | 27.2       | 5.06                      | 18.46     | 5.11       | 4.83       | 31.42                                | 47.53     | 29.51      | 29.51      | 3.13                                | 0.86      | 1.85       | 2.21       | 268                                 | 248.4     | 131.5      | 240.3      |
| ST50                |                                        |           |            |            | 8.47                      | 18.13     | 24.32      | 8.83       | 47.53                                | 36.79     | 145.2      | 79.77      | 3.18                                | 0.54      | 0.17       | 5.1        | 251.7                               | 228.8     | 278.5      | 137.4      |
| HT10                |                                        |           |            |            | 5.32                      | 19.39     | 6.92       | 7.74       | 40.37                                | 49.32     | 39.98      | 26.37      | 2.56                                | 0.62      | 0.63       | 1.83       | 281.1                               | 238.6     | 131.5      | 125.6      |
| HT50 <sup>c</sup>   |                                        |           |            |            | 11.99                     |           | 18.02      | 12.35      | 36.8                                 |           | 31.6       | 60.92      | 2.42                                |           | 0.67       | 3.07       | 228.8                               |           | 143.3      | 122.7      |
| MT10                |                                        |           |            |            | 11.89                     | 19.48     | 18.24      | 16.49      | 27.85                                | 40.37     | 27.42      | 76.63      | 1.48                                | 0.47      | 0.24       | 3.17       | 294.2                               | 248.4     | 131.5      | 128.5      |
| LT10                |                                        |           |            |            | 11.34                     | 18.46     | 21.30      | 19.30      | 29.63                                | 45.74     | 56.73      | 26.37      | 1.44                                | 0.82      | 1.06       | 1.81       | 310.5                               | 258.2     | 131.5      | 131.5      |
