# Supplementary material for: Microbial community structure shows differing levels of temporal stability in intertidal beach sands of the grand strand region of South Carolina
Source: PubMed Central journal article supplement (PMC7046189; doi:10.1371/journal.pone.0229387), 2020-02-27
Supplement: pone.0229387.s010.pdf [file pone.0229387.s010.pdf]

| Sampling Date  | Sample | Richness | Mean Richness Index $\pm$ SD |                | Mean Diversity Index $\pm$ SD |                 |
|----------------|--------|----------|------------------------------|----------------|-------------------------------|-----------------|
|                |        |          | Chao1                        | ACE            | Inverse Simpson               | Shannon         |
| September 2016 | ST10   | 1187     | 1680 $\pm$ 132               | 1588 $\pm$ 83  | 238.04 $\pm$ 22.33            | 6.33 $\pm$ 0.03 |
|                | ST50   | 757      | 1027 $\pm$ 94                | 978 $\pm$ 60   | 129.12 $\pm$ 6.90             | 5.60 $\pm$ 0.03 |
|                | HT10   | 2059     | 3641 $\pm$ 260               | 4777 $\pm$ 240 | 100.48 $\pm$ 11.40            | 6.55 $\pm$ 0.04 |
|                | HT50   | 1427     | 1910 $\pm$ 113               | 1896 $\pm$ 86  | 119.20 $\pm$ 13.21            | 6.34 $\pm$ 0.04 |
|                | MT10   | 1388     | 1841 $\pm$ 107               | 1847 $\pm$ 86  | 126.41 $\pm$ 13.27            | 6.30 $\pm$ 0.04 |
|                | LT10   | 1759     | 2495 $\pm$ 143               | 2574 $\pm$ 126 | 155.35 $\pm$ 18.48            | 6.60 $\pm$ 0.04 |
| January 2017   | ST10   | 783      | 1226 $\pm$ 120               | 1318 $\pm$ 120 | 12.93 $\pm$ 0.32              | 3.96 $\pm$ 0.06 |
|                | ST50   | 582      | 807 $\pm$ 80                 | 812 $\pm$ 65   | 8.15 $\pm$ 0.38               | 3.64 $\pm$ 0.06 |
|                | HT10   | 561      | 813 $\pm$ 86                 | 869 $\pm$ 83   | 7.73 $\pm$ 0.33               | 3.41 $\pm$ 0.06 |
|                | HT50   | 685      | 970 $\pm$ 89                 | 1007 $\pm$ 81  | 18.51 $\pm$ 0.94              | 4.25 $\pm$ 0.05 |
|                | MT10   | 478      | 657 $\pm$ 71                 | 680 $\pm$ 63   | 20.21 $\pm$ 1.12              | 4.16 $\pm$ 0.04 |
|                | LT10   | 413      | 515 $\pm$ 48                 | 529 $\pm$ 42   | 6.53 $\pm$ 0.32               | 3.42 $\pm$ 0.05 |
| April 2017     | ST10   | 1584     | 2321 $\pm$ 155               | 2294 $\pm$ 117 | 161.13 $\pm$ 18.47            | 6.50 $\pm$ 0.04 |
|                | ST50   | 1287     | 1606 $\pm$ 82                | 1651 $\pm$ 73  | 135.67 $\pm$ 14.91            | 6.28 $\pm$ 0.04 |
|                | HT10   | 1059     | 1343 $\pm$ 86                | 1309 $\pm$ 59  | 176.41 $\pm$ 15.94            | 6.18 $\pm$ 0.03 |
|                | HT50   | 1722     | 2377 $\pm$ 133               | 2392 $\pm$ 109 | 370.33 $\pm$ 28.12            | 6.72 $\pm$ 0.03 |
|                | MT10   | 1924     | 3043 $\pm$ 197               | 3149 $\pm$ 174 | 156.14 $\pm$ 18.13            | 6.62 $\pm$ 0.04 |
|                | LT10   | 1723     | 2512 $\pm$ 153               | 2578 $\pm$ 133 | 134.43 $\pm$ 14.39            | 6.47 $\pm$ 0.04 |
| September 2017 | ST10   | 698      | 773 $\pm$ 34                 | 785 $\pm$ 30   | 94.92 $\pm$ 6.14              | 5.52 $\pm$ 0.3  |
|                | ST50   | 1117     | 1439 $\pm$ 89                | 1445 $\pm$ 71  | 118.06 $\pm$ 10.78            | 6.02 $\pm$ 0.04 |
|                | HT10   | 1132     | 1512 $\pm$ 95                | 1571 $\pm$ 88  | 21.55 $\pm$ 1.46              | 5.10 $\pm$ 0.06 |
|                | HT50   | 1323     | 1680 $\pm$ 87                | 1717 $\pm$ 76  | 96.52 $\pm$ 7.24              | 5.99 $\pm$ 0.04 |
|                | MT10   | 1065     | 1261 $\pm$ 63                | 1245 $\pm$ 45  | 188.75 $\pm$ 11.91            | 6.11 $\pm$ 0.03 |
|                | LT10   | 1364     | 1664 $\pm$ 79                | 1660 $\pm$ 61  | 220.33 $\pm$ 19.40            | 6.45 $\pm$ 0.03 |
