# Supplementary material for: Microbial community structure shows differing levels of temporal stability in intertidal beach sands of the grand strand region of South Carolina
Source: PubMed Central journal article supplement (PMC7046189; doi:10.1371/journal.pone.0229387), 2020-02-27
Supplement: pone.0229387.s011.pdf [file pone.0229387.s011.pdf]

| Sampling Date  | Sample                    | Richness | Mean Richness Index $\pm$ SD |                | Mean Diversity Index $\pm$ SD |                    |
|----------------|---------------------------|----------|------------------------------|----------------|-------------------------------|--------------------|
|                |                           |          | Chao1                        | ACE            | Inverse Simpson               | Shannon            |
| September 2016 | ST10                      | 1185     | 1444 $\pm$ 74                | 1447 $\pm$ 58  | 139.45 $\pm$ 13.69            | 6.19 $\pm$ 0.03    |
|                | ST50                      | 1414     | 1794 $\pm$ 94                | 1790 $\pm$ 73  | 120.35 $\pm$ 11.04            | 6.29 $\pm$ 0.04    |
|                | HT10                      | 2008     | 3157 $\pm$ 200               | 3221 $\pm$ 168 | 102.05 $\pm$ 11.46            | 6.57 $\pm$ 0.04    |
|                | HT50                      | 1691     | 2208 $\pm$ 111               | 2211 $\pm$ 89  | 164.70 $\pm$ 18.63            | 6.58 $\pm$ 0.04    |
|                | MT10                      | 1866     | 2768 $\pm$ 164               | 2927 $\pm$ 155 | 86.54 $\pm$ 9.23              | 6.42 $\pm$ 0.04    |
|                | LT10                      | 1696     | 2336 $\pm$ 129               | 2412 $\pm$ 115 | 112.01 $\pm$ 12.15            | 6.43 $\pm$ 0.04    |
|                | January 2017 <sup>a</sup> | ST10     | 1147                         | 1388 $\pm$ 72  | 1386 $\pm$ 56                 | 122.57 $\pm$ 12.19 |
| ST50           |                           | 780      | 936 $\pm$ 58                 | 948 $\pm$ 49   | 114.88 $\pm$ 8.61             | 5.74 $\pm$ 0.03    |
| HT10           |                           | 1540     | 2001 $\pm$ 106               | 1982 $\pm$ 81  | 148.52 $\pm$ 31.56            | 6.47 $\pm$ 0.04    |
| MT10           |                           | 1614     | 2219 $\pm$ 130               | 2206 $\pm$ 100 | 105.26 $\pm$ 21.21            | 6.39 $\pm$ 0.04    |
| LT10           |                           | 1479     | 1813 $\pm$ 82                | 1842 $\pm$ 70  | 139.71 $\pm$ 14.57            | 6.43 $\pm$ 0.04    |
| April 2017     |                           | ST10     | 867                          | 1071 $\pm$ 72  | 1043 $\pm$ 49                 | 111.09 $\pm$ 9.85  |
|                | ST50                      | 2007     | 2664 $\pm$ 125               | 2707 $\pm$ 106 | 238.32 $\pm$ 28.03            | 6.86 $\pm$ 0.03    |
|                | HT10                      | 1776     | 2495 $\pm$ 140               | 2566 $\pm$ 123 | 159.92 $\pm$ 16.40            | 6.55 $\pm$ 0.04    |
|                | HT50                      | 1320     | 1650 $\pm$ 87                | 1636 $\pm$ 66  | 207.12 $\pm$ 18.97            | 6.39 $\pm$ 0.03    |
|                | MT10                      | 1800     | 2495 $\pm$ 137               | 2556 $\pm$ 117 | 155.45 $\pm$ 17.21            | 6.61 $\pm$ 0.04    |
|                | LT10                      | 2131     | 3370 $\pm$ 206               | 3541 $\pm$ 189 | 217.59 $\pm$ 22.64            | 6.77 $\pm$ 0.04    |
|                | September 2017            | ST10     | 2273                         | 3572 $\pm$ 211 | 3665 $\pm$ 182                | 219.26 $\pm$ 25.94 |
| ST50           |                           | 2287     | 3816 $\pm$ 240               | 4853 $\pm$ 224 | 161.99 $\pm$ 18.46            | 6.79 $\pm$ 0.04    |
| HT10           |                           | 2073     | 3014 $\pm$ 161               | 3204 $\pm$ 157 | 138.56 $\pm$ 15.66            | 6.68 $\pm$ 0.04    |
| HT50           |                           | 2131     | 3198 $\pm$ 180               | 3341 $\pm$ 165 | 166.24 $\pm$ 18.64            | 6.74 $\pm$ 0.04    |
| MT10           |                           | 2246     | 3798 $\pm$ 245               | 4991 $\pm$ 232 | 132.65 $\pm$ 15.35            | 6.72 $\pm$ 0.04    |
| LT10           |                           | 2151     | 3372 $\pm$ 202               | 3559 $\pm$ 187 | 158.13 $\pm$ 18.02            | 6.73 $\pm$ 0.04    |
