# Supplementary material for: Microbial community structure shows differing levels of temporal stability in intertidal beach sands of the grand strand region of South Carolina
Source: PubMed Central journal article supplement (PMC7046189; doi:10.1371/journal.pone.0229387), 2020-02-27
Supplement: pone.0229387.s012.pdf [file pone.0229387.s012.pdf]

| Myrtle Beach   |           |          |                |                       |                         |                           |                                          |      |
|----------------|-----------|----------|----------------|-----------------------|-------------------------|---------------------------|------------------------------------------|------|
| OTU #          | Sequences | Kingdom  | Phylum         | Order                 | Family                  | Genus                     | BLAST Match                              | % ID |
| 3              | 36676     | Bacteria | Firmicutes     | Bacillales            | Bacillaceae             | Bacillaceae_unclassified  | <i>Bacillus</i> sp.                      | 98.4 |
| 1              | 36153     | Bacteria | Proteobacteria | Steroidobacteriales   | Woeseiaceae             | Woeseia                   | Uncultured gammaproteo                   | 99.6 |
| 4              | 14508     | Bacteria | Firmicutes     | Bacillales            | Bacillales_unclassified | Bacillales_unclassified   | <i>Bacillus</i> <i>alkalophilus</i>      | 98.8 |
| 18             | 11739     | Bacteria | Proteobacteria | SAR11_clade           | Clade_I                 | Clade_Ia(98)              | Uncultured SAR11 cluster                 | 99.2 |
| 2              | 11708     | Bacteria | Firmicutes     | Bacillales            | Bacillaceae             | Bacillaceae_unclassified  | <i>Bacillus</i> <i>algicola</i>          | 99.2 |
| 5              | 10387     | Bacteria | Proteobacteria | BD7-8                 | BD7-8_fa                | BD7-8_ge                  | Uncultured gammaproteo                   | 98.8 |
| 10             | 9400      | Archaea  | Thaumarchaeota | Nitrosopumilales      | Nitrosopumilaceae       | Nitrosopumilaceae_ge      | Uncultured marine archaeon               | 98.4 |
| 14             | 8903      | Bacteria | Firmicutes     | Bacillales            | Planococcaceae          | Planococcus               | <i>Planococcus</i> <i>doughaensis</i>    | 98.8 |
| 9              | 8361      | Bacteria | Proteobacteria | Alteromonadales       | Pseudalteromonadaceae   | Pseudalteromonas          | <i>Pseudalteromonas</i> <i>carragees</i> | 99.2 |
| 11             | 7696      | Archaea  | Thaumarchaeota | Nitrosopumilales      | Nitrosopumilaceae       | Candidatus_Nitrosopumilus | <i>Nitrosopumilus</i> <i>piranensis</i>  | 99.2 |
| Garden City    |           |          |                |                       |                         |                           |                                          |      |
| OTU #          | Sequences | Kingdom  | Phylum         | Order                 | Family                  | Genus                     | BLAST Match                              | % ID |
| 2              | 87028     | Bacteria | Firmicutes     | Bacillales            | Bacillaceae             | Bacillaceae_unclassified  | <i>Bacillus</i> <i>algicola</i>          | 99.2 |
| 3              | 57864     | Bacteria | Firmicutes     | Bacillales            | Bacillaceae             | Bacillaceae_unclassified  | <i>Bacillus</i> sp.                      | 98.4 |
| 4              | 51173     | Bacteria | Firmicutes     | Bacillales            | Bacillales_unclassified | Bacillales_unclassified   | <i>Bacillus</i> <i>alkalophilus</i>      | 98.8 |
| 1              | 32456     | Bacteria | Proteobacteria | Steroidobacteriales   | Woeseiaceae             | Woeseia                   | Uncultured gammaproteo                   | 99.6 |
| 8              | 17811     | Bacteria | Firmicutes     | Bacillales            | Bacillales_unclassified | Bacillales_unclassified   | Uncultured Firmicutes                    | 98.8 |
| 13             | 17745     | Bacteria | Proteobacteria | Alteromonadales       | Pseudalteromonadaceae   | Psychrosphaera            | <i>Psychrosphaera</i> sp.                | 98.4 |
| 6              | 14184     | Bacteria | Proteobacteria | Rhodobacteriales      | Rhodobacteraceae        | Rhodobacteraceae_uncl     | <i>Loxanella</i> sp.                     | 99.2 |
| 9              | 13412     | Bacteria | Proteobacteria | Alteromonadales       | Pseudalteromonadaceae   | Pseudalteromonas          | <i>P. carragenovora</i>                  | 99.2 |
| 28             | 10495     | Bacteria | Proteobacteria | Alteromonadales       | Pseudalteromonadaceae   | Psychrosphaera            | <i>Psychrosphaera</i> sp.                | 96.8 |
| 21             | 9207      | Bacteria | Proteobacteria | Alteromonadales       | Alteromonadaceae        | Alteromonas               | <i>Alteromonas</i> <i>stellipolaris</i>  | 98.8 |
| Pawleys Island |           |          |                |                       |                         |                           |                                          |      |
| OTU #          | Sequences | Kingdom  | Phylum         | Order                 | Family                  | Genus                     | BLAST Match                              | % ID |
| 1              | 62217     | Bacteria | Proteobacteria | Steroidobacteriales   | Woeseiaceae             | Woeseia                   | Uncultured gammaproteo                   | 99.6 |
| 5              | 15943     | Bacteria | Proteobacteria | BD7-8                 | BD7-8_fa                | BD7-8_ge                  | Uncultured gammaproteo                   | 98.8 |
| 7              | 13150     | Bacteria | Acidobacteria  | Thermoanaerobaculales | Thermoanaerobaculaceae  | Subgroup_10               | Uncultured Acidobacteria                 | 98.4 |
| 11             | 8046      | Archaea  | Thaumarchaeota | Nitrosopumilales      | Nitrosopumilaceae       | Candidatus_Nitrosopumilus | <i>Nitrosopumilus</i> <i>piranensis</i>  | 99.2 |
| 10             | 7556      | Archaea  | Thaumarchaeota | Nitrosopumilales      | Nitrosopumilaceae       | Nitrosopumilaceae_ge      | Uncultured marine archaeon               | 98.4 |
| 12             | 7500      | Bacteria | Actinobacteria | Actinomarinales       | uncultured              | uncultured_ge             | Uncultured actinobacterium               | 98.4 |
| 17             | 7104      | Bacteria | Proteobacteria | Myxococcales          | Sandaracinaceae         | uncultured                | <i>Sandaracinus</i> sp.                  | 99.2 |
| 15             | 6486      | Bacteria | Planctomycetes | Pirellales            | Pirellaceae             | Rubripirellala            | Uncultured planctomycete                 | 98.8 |
| 26             | 5952      | Bacteria | Bacteroidetes  | Flavobacteriales      | Flavobacteriaceae       | Muricola                  | <i>Muricola</i> sp.                      | 97.2 |
| 22             | 5750      | Archaea  | Thaumarchaeota | Nitrosopumilales      | Nitrosopumilaceae       | Nitrosopumilaceae_uncl    | Uncultured archaeon                      | 98.4 |
